# Supplementary material for: First Detection of Paralytic Shellfish Toxins from Alexandrium pacificum above the Regulatory Limit in Blue Mussels (Mytilus galloprovincialis) in New South Wales, Australia
Source: MDPI journal article supplement (doi:10.3390/microorganisms8060905), 2020-06-16

Fig. S1A. Standard curve developed from *A. australiense* strain AT-YC-H

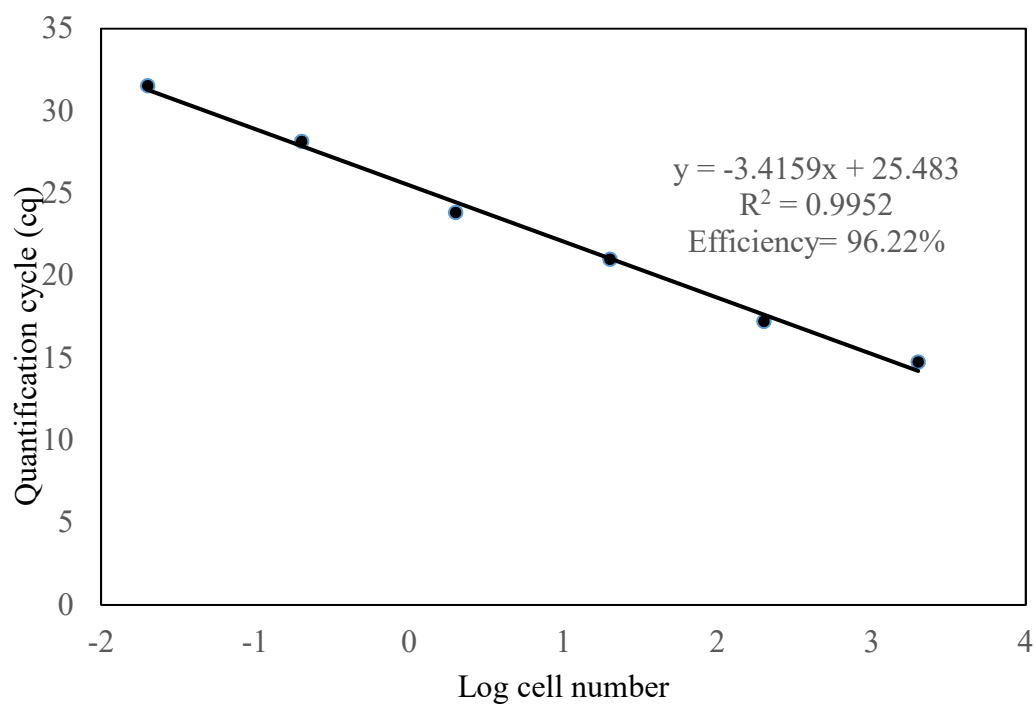

Fig. S1 B. Standard curve developed from *A. pacificum* strain CS300

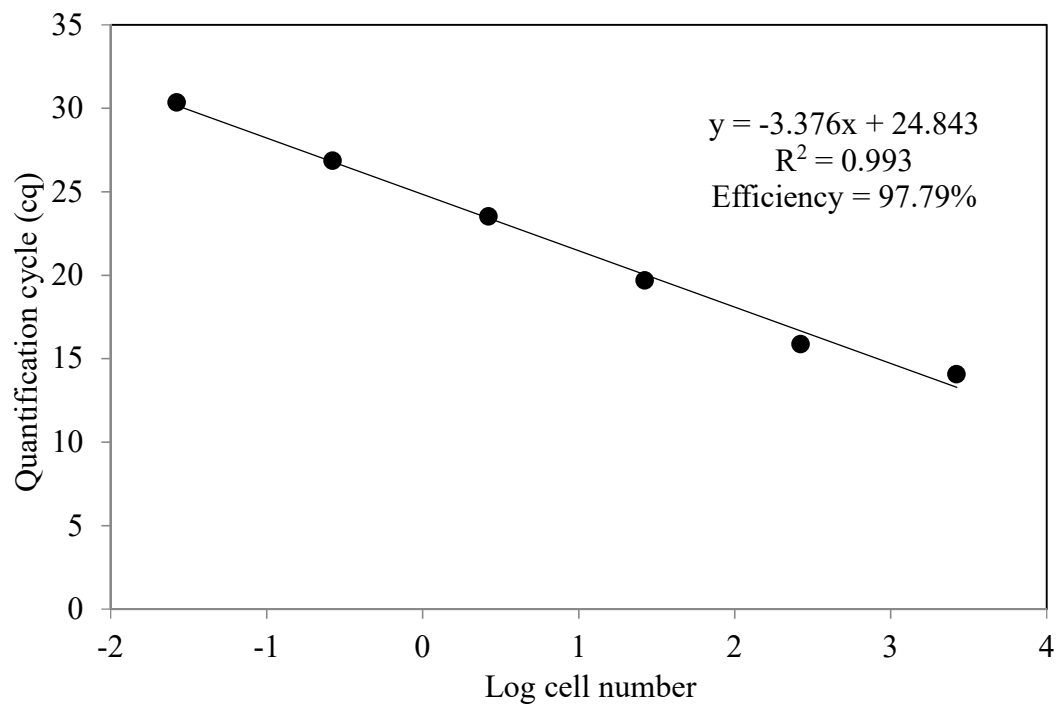

Supplement: s1 [file s1]
