# Supplementary material for: First Detection of Paralytic Shellfish Toxins from Alexandrium pacificum above the Regulatory Limit in Blue Mussels (Mytilus galloprovincialis) in New South Wales, Australia
Source: MDPI journal article supplement (doi:10.3390/microorganisms8060905), 2020-06-16
Supplement: s1 [file s1]

Table S4

| <b>LC-MS Method</b> |                       |                                                                |                                                       |
|---------------------|-----------------------|----------------------------------------------------------------|-------------------------------------------------------|
| Time                | Flow Rate<br>(mL/min) | % A<br>(Water: FA: NH <sub>4</sub> OH<br>500:0.075:0.3, V/V/V) | %B<br>(Acetonitrile: water: FA<br>700:300:0.1, V/V/V) |
| Initial             | 0.4                   | 2                                                              | 98                                                    |
| 5                   | 0.4                   | 2                                                              | 98                                                    |
| 7.5                 | 0.4                   | 50                                                             | 50                                                    |
| 9                   | 0.5                   | 50                                                             | 50                                                    |
| 9.5                 | 0.5                   | 2                                                              | 98                                                    |
| 10                  | 0.8                   | 2                                                              | 98                                                    |
| 10.6                | 0.8                   | 2                                                              | 98                                                    |
| 11                  | 0.4                   | 2                                                              | 98                                                    |
